# Supplementary material for: Exclusive Breastfeeding and Normative Belief among Rural Mothers in Ethiopia, 2019: A Cross-Sectional Survey Embedded with Qualitative Design
Source: Obstet Gynecol Int. 2021 Mar 16;2021:5587790. doi: 10.1155/2021/5587790 (PMC7987461; doi:10.1155/2021/5587790)
Supplement: Supplementary Materials — Supplementary 1. English Version Questionnaire. STROBE checklist for cross-sectional Studies. [file 5587790.f1.zip]

Archive with 2 entries (2 files):
- 5587790.f1/STROBE_checklist_cross-sectional.doc
- 5587790.f1/Supplement 1.docx
